# Supplementary material for: Cell Wall Trapping of Autocrine Peptides for Human G-Protein-Coupled Receptors on the Yeast Cell Surface
Source: PubMed Central journal article supplement (PMC3356411; doi:10.1371/journal.pone.0037136), 2012-05-18
Supplement: pone.0037136.s006.pdf [file pone.0037136.s006.pdf]

**Table S1. List of primers**

**Construction of yeast strain with *bar1*Δ allele (IM-4)**

*Amplification of LEU2 marker from pRS405 (American Type Culture Collection, Manassas, VA, USA)*

5'ATCGCCTAAAATCATACCAAATAAAAAGAGTGTCTAGAAGGGTCATATATCGACTACGT  
CGTAAGGCCGTTTCTGACAG

5'ACTATATATTTGATATTTATATGCTATAAAGAAATTGTACTCCAGATTTCTCGACGGTCTGA  
GGAGAACTTCTAGTATATC

**Construction of α-factor secretion plasmid**

*Generation of s.s.-α-factor-FLAG-*taa* fragment for pUESCαf from pUESCαf*

5'-CCCCGGATCCATGAGATTTCTTCAATTTT

5'-AAAACTCGAGTTACTTGTTCATCGTCATCCT

**Construction of α-factor displaying plasmids (Flo42, Flo102, Flo146, Flo318 and 3'AG)**

*Generation of s.s.-α-factor-FLAG fragment for pUESCαf from BY4741 genomic DNA*

5'-CCCCGGATCCATGAGATTTCTTCAATTTT

5'-AAAACTCGAGCTTGTTCATCGTCATCCTTGTAGTCGTACATTGGTTGGCCAGGTTTTAGT  
TGCAACCAATGCCA

*Generation of s.s.-α-factor-FLAG(+gg) fragment for pUESCαf(AG) from pUESCαf*

5'-CCCCGGATCCATGAGATTTCTTCAATTTT

5'-AAAACTCGAGCCCTTGTTCATCGTCATCCTTGTAGTCGTACATTGGTTGGCCAGGTTTTA  
GTTGCAACCAATGCCA

*Generation of FLO42 anchor fragment for pUESCαf-FLO42 from pIF42 (Sato et al.)*

5'-TTCCCTCGAGAGCAGCATGGTAGGATATAG

5'-CCCCGCTAGCTTAAATAATTGCCAGCAATA

*Generation of FLO102 anchor fragment for pUESCαf-FLO102 from pIF102 (Sato et al.)*

5'-TGGGCTCGAGAAAACAGTAGTCACCTCTTC

5'-CCCCGCTAGCTTAAATAATTGCCAGCAATA

*Generation of FLO146 anchor fragment for pUESCαf-FLO146 from pIF146 (Sato et al.)*

5'-TTTTCTCGAGGCGAATGAAGAGTCTGTCTAG

5'-CCCCGCTAGCTTAAATAATTGCCAGCAATA

*Generation of FLO318 anchor fragment for pUESCαf-FLO318 from pIF318 (Sato et al.)*

5'-GTTTCTCGAGTTACCACCTGCTACCACTACAAAACGAGCGAACAAACCA

5'-CCCCGCTAGCTTAAATAATTGCCAGCAATA

*Generation of 3'-half of  $\alpha$ -agglutinin anchor fragment for pUESC $\alpha$ -AG from BY4741 genomic DNA*

5'-GGGACTCGAGCGCCAAAAGCTCTTTTATCT  
5'-TCCCGCTAGCTTAGAATAGCAGGTACGACA

**Construction of somatostatin (S-14) displaying plasmid**

*Generation of FLAG-FLO42 fragment for pGK426-tgFLO42 from pUESC $\alpha$ -FLO42*

5'-CCCCGTCGACGACTACAAGGATGACGATGACAAGAGCAGCATGGTAGGAT  
5'-GGGGAGATCTTTAAATAATTGCCAGCAATA

*Generation of s.s. fragment with partial S-14 sequence for overlapping PCR from pUESC $\alpha$*

5'-GGGGGCTAGCATGAGATTTCTTCAATTTT  
5'-ATTCTTGCAGCCAGCTCTTTTATCCAAAGA

*Generation of s.s.-S-14 fragment for pGK-S1442 by overlapping PCR*

5'-GGGGGCTAGCATGAGATTTCTTCAATTTT  
5'-AAAAGTCGACACAGGATGTGAAAGTCTCCAGAAGAAATTCTTGCAGCCAGC

**Construction of other peptides displaying control plasmids**

*Generation of s.s. fragment with partial  $\alpha$ -factor sequence for overlapping PCR from pUESC $\alpha$*

5'-GGGGGCTAGCATGAGATTTCTTCAATTTT  
5'-TTGCAACCAATGCCATCTTTTATCCAAAGA

*Generation of s.s.- $\alpha$ -factor fragment for pGK- $\alpha$ 42 by overlapping PCR*

5'-GGGGGCTAGCATGAGATTTCTTCAATTTT  
5'-AAAAGTCGACGTACATTGGTTGGCCAGGTTTTAGTTGCAACCAATGCCA

*Generation of s.s.-All fragment for pGK-All42 from pUESC $\alpha$*

5'-GGGGGCTAGCATGAGATTTCTTCAATTTT  
5'-TTTTGTCGACGAAGGGGTGTATGTACACCCGGTCTTTTTATCCAAAGATACCC

*Generation of s.s.-ET1 fragment for pGK-ET142 from pUESC $\alpha$*

5'-GGGGGCTAGCATGAGATTTCTTCAATTTT  
5'-TTTTGTCGACCCAAATGATGTCCAGGTGGCAGAAGTAGACACACTCTTTATCCATCAGG  
GACGAGCAGGAGCATCTTTTATCCAAAGATACCC

*Generation of s.s. fragment without peptide sequence for pGK42 from pUESC $\alpha$*

5'-GGGGGCTAGCATGAGATTTCTTCAATTTT  
5'-GGGGGTCGACTCTTTTATCCAAAGATACCC

**Construction of  $\alpha$ -factor displaying plasmids (Suc2(N), Suc2(C), FS(N) and FS(C))**

*Generation of SUC2(N) anchor fragment for pUESC $\alpha$ -SUC2(N) from pWGP3-SUC2 (Tanino et al.)*

5'-TGGGCTCGAGATGACAAACGAAACTAGCGA

5'-CCCCGCTAGCCTATTTACTTCCCTTACTT

*Generation of SUC2(C)-FLAG- $\alpha$ -factor fragment for pUESC-SUC2f $\alpha$ (C) from pWGP3-SUC2 (Tanino et al.)*

5'-GGGAGTCGACATGCTTTTGCAAGCTTTCCT

5'-CCCCGCTAGCCTTAGTACATTGGTTGGCCAGGTTTTAGTTGCAACCAATGCCACTTGTCA  
TCGTCATCCTTGAGTCTTTACTTCCCTTACTTGGAACT

*Generation of FS(N) anchor fragment for pUESC $\alpha$ -FS(N) from pWIFS (Matsumoto et al.)*

5'-TTTTCTCGAGGAGGCGTGCTTACCAGCAGG

5'-AAAACCGCGGTTAGGTGATTTGTCCTGA

*Generation of FS(C)-FLAG- $\alpha$ -factor fragment for pUESC-FSf $\alpha$ (C) from pWIFS (Matsumoto et al.)*

5'-AAAAGGATCCATGACAATGCCTCATCGCTA

5'-CCCCCTCGAGTTAGTACATTGGTTGGCCAGGTTTTAGTTGCAACCAATGCCACTTGTCA  
TCGTCATCCTTGAGTCGGTGATTTGTCCTGAAGATGATG

**Construction of other types of somatostatin displaying plasmids**

*Generation of s.s.(prepro- $\alpha$ -factor) fragment with partial S-28 sequence for overlapping PCR from pUESC $\alpha$*

5'-GGGGGCTAGCATGAGATTTCTTCAATTTT

5'-GTTTGAGTTAGCAGATCTTTTATCCAAAGA

*Generation of s.s.(prepro- $\alpha$ -factor)-S-28 fragment for pGK-S2842 by overlapping PCR*

5'-GGGGGCTAGCATGAGATTTCTTCAATTTT

5'-AAAAGTCGACACAGGATGTGAAAGTCTTCCAGAAGAAATTCTTGCAGCCAGCTTTGCGT  
TCTCGGGTGCCATAGCCGGGTTTGAGTTAGCAGA

*Generation of s.s.(pre- $\alpha$ -factor)-S-14 fragment for pGK-AS1442 with synthetic oligonucleotides*

5'-AAAAGCTAGCATGAGATTTCTTCAATTTTTACTGCAGTTTTATTTCGCAGCATCCTCCGC  
ATTAGCTGCTGGCTGCAAGAATTTCTTCTGGAAGACTTTTACATCCTGT

5'-AAAAGTCGACACAGGATGTGAAAGTCTTCCAGAAGAAATTCTTGCAGCCAGC

*Generation of s.s.(Suc2)-S-14 fragment for pGK-SS1442 with synthetic oligonucleotides*

5'-AAAAGCTAGCATGCTTTTGCAAGCTTTCTTTTCTTTTGGCTGGTTTTGCAGCCAAAAT  
ATCTGCAGCTGGCTGCAAGAATTTCTTCTGGAAGACTTTTACATCCTGT

5'-AAAAGTCGACACAGGATGTGAAAGTCTTCCAGAAGAAATTCTTGCAGCCAGC

**Cell wall trapping of autocrine peptides for human G-protein-coupled receptors on the yeast cell surface**

*Generation of s.s.(GLA)-S-14 fragment for pGK-GS1442 with synthetic oligonucleotides*

5'-AAAAGCTAGCATGCAACTGTTCAATTTGCCATTGAAAGTTTCATTCTTTCTCGTCCTCTC  
TTACTTTTCTTTGCTCGTTTCTGCTGCTGGCTGCAAGAATTTCTTCTGGAAGACTTTTCAC  
5'-AAAAGTCGACACAGGATGTGAAAGTCTTCCAGAAGAAATTCTTGCAGCCAGC

*Generation of s.s.(prepro- $\alpha$ -factor)-S-14-GS5 (GGGGS linker) fragment for pGS5-S1442 from pGK-S1442*

5'-GGGGGCTAGCATGAGATTTTCTTCAATTTT  
5'-TTTTGTCGACAGAACCACCACCACCACAGGATGTGAAAGTCTTCCAGAAG

*Generation of s.s.(prepro- $\alpha$ -factor)-S-14-GS9 (GGGSGGGGS linker) fragment for pGS9-S1442 from pGK-S1442*

5'-GGGGGCTAGCATGAGATTTTCTTCAATTTT  
5'-TTTTGTCGACAGAACCACCACCAGAACACCACCACCACAGGATGTGAAAGTCTTCCA  
GAAGAAATTCTTGCAGCC
