# Supplementary material for: Cell Wall Trapping of Autocrine Peptides for Human G-Protein-Coupled Receptors on the Yeast Cell Surface
Source: PubMed Central journal article supplement (PMC3356411; doi:10.1371/journal.pone.0037136), 2012-05-18
Supplement: pone.0037136.s007.pdf [file pone.0037136.s007.pdf]

**Table S2. Plasmids used in Supplementary data**

| Plasmid                            | Relative feature                                                                                       | Source     |
|------------------------------------|--------------------------------------------------------------------------------------------------------|------------|
| <b><u>α-factor display</u></b>     |                                                                                                        |            |
| pUESCαf-SUC2(N)                    | pESC-URA, α-factor–Flag–Suc2(N) fusion protein expression (for display)                                | This study |
| pUESC-SUC2fα(C)                    | pESC-URA, Suc2(C)–Flag–α-factor fusion protein expression (for display)                                | This study |
| pUESCαf-FS(N)                      | pESC-URA, α-factor–Flag–FS(N) fusion protein expression (for display)                                  | This study |
| pUESC-FSfα(C)                      | pESC-URA, FS(C)–Flag–α-factor fusion protein expression (for display)                                  | This study |
| <b><u>Somatostatin display</u></b> |                                                                                                        |            |
| pGK-S2842                          | pGK426, s.s.(prepro-α-factor)–S-28–Flag–Flo42 <sup>a</sup> fusion protein expression (for display)     | This study |
| pGK-AS1442                         | pGK426, s.s.(pre-α-factor)–S-14–Flag–Flo42 fusion protein expression (for display)                     | This study |
| pGK-SS1442                         | pGK426, s.s.(Suc2)–S-14–Flag–Flo42 <sup>b</sup> fusion protein expression (for display)                | This study |
| pGK-GS1442                         | pGK426, s.s.(GLA)–S-14–Flag–Flo42 <sup>c</sup> fusion protein expression (for display)                 | This study |
| pGS5-S1442                         | pGK426, s.s.(prepro-α-factor)–S-14–GS5–Flag–Flo42 <sup>d</sup> fusion protein expression (for display) | This study |
| pGS9-S1442                         | pGK426, s.s.(prepro-α-factor)–S-14–GS9–Flag–Flo42 <sup>e</sup> fusion protein expression (for display) | This study |

All transcription products without instructions contain the secretion signal sequences of prepro-α-factor.

<sup>a</sup>S-28 encodes 28 aa peptide of somatostatin active isoform.

<sup>b</sup>Suc2 signal sequence is derived from *S. cerevisiae*.

<sup>c</sup>GLA indicates signal sequence of glucoamylase derived from *R. oryzae*.

<sup>d</sup>GS5 indicates GGGGS linker.

<sup>e</sup>GS9 indicates GGGSGGGGS linker.
