# Supplementary material for: Cell Wall Trapping of Autocrine Peptides for Human G-Protein-Coupled Receptors on the Yeast Cell Surface
Source: PubMed Central journal article supplement (PMC3356411; doi:10.1371/journal.pone.0037136), 2012-05-18
Supplement: pone.0037136.s008.pdf [file pone.0037136.s008.pdf]

**Table S3. List of strains and transformants used for assays**

| Strain/plasmid                               | Description                                                                        |
|----------------------------------------------|------------------------------------------------------------------------------------|
| <b>Figure 3</b>                              |                                                                                    |
| IMG-4/pESC-URA                               | Mock control                                                                       |
| IMG-4/pUESC $\alpha$ sf                      | $\alpha$ -factor secretion                                                         |
| IMG-4/pUESC $\alpha$ f-AG                    | $\alpha$ -factor display by AG anchor                                              |
| IMG-4/pUESC $\alpha$ f-FLO42                 | $\alpha$ -factor display by Flo42 anchor                                           |
| IMG-4/pUESC $\alpha$ f-FLO102                | $\alpha$ -factor display by Flo102 anchor                                          |
| IMG-4/pUESC $\alpha$ f-FLO146                | $\alpha$ -factor display by Flo146 anchor                                          |
| IMG-4/pUESC $\alpha$ f-FLO318                | $\alpha$ -factor display by Flo318 anchor                                          |
| <b>Figure 4A, 5 and 7</b>                    |                                                                                    |
| IMFD-70/pGK421/pGK426                        | Mock control / Mock control                                                        |
| IMFD-70/pGK-SSTR5-HA/pGK426                  | SSTR5 expression / Mock control                                                    |
| IMFD-70/pGK-SSTR5-HA/pGK42                   | SSTR5 expression / Flo42 anchor display (no peptide)                               |
| IMFD-70/pGK-SSTR5-HA/pGK-S1442               | SSTR5 expression / S-14 display by Flo42 anchor                                    |
| IMFD-70/pGK421/pGK-S1442                     | Mock control / S-14 display by Flo42 anchor                                        |
| <b>Figure 4B</b>                             |                                                                                    |
| IMFD-70/pGK-SSTR5-HA/pGK-alpha42             | SSTR5 expression / $\alpha$ -factor display by Flo42 anchor                        |
| IMFD-70/pGK-SSTR5-HA/pGK-All42               | SSTR5 expression / All display by Flo42 anchor                                     |
| IMFD-70/pGK-SSTR5-HA/pGK-ET142               | SSTR5 expression / ET1 display by Flo42 anchor                                     |
| <b>Figure 6</b>                              |                                                                                    |
| IMFD-70/pGK-SSTR5-HA/pGK42<br>/pMHG-FIG1     | SSTR5 expression / Flo42 anchor display (no peptide)                               |
| IMFD-70/pGK-SSTR5-HA/pGK-S1442<br>/pMHG-FIG1 | SSTR5 expression / S-14 display by Flo42 anchor                                    |
| <b>Figure S1</b>                             |                                                                                    |
| IMG-4/pUESC $\alpha$ f-FLO42                 | $\alpha$ -factor display by Flo42 anchor                                           |
| <b>Figure S2</b>                             |                                                                                    |
| IMG-4/pESC-URA                               | Mock control                                                                       |
| IMG-4/pUESC $\alpha$ f-FLO42                 | $\alpha$ -factor display by Flo42 anchor                                           |
| IMG-4/pUESC $\alpha$ f-SUC2(N)               | $\alpha$ -factor display by Suc2(N) anchor                                         |
| IMG-4/pUESC $\alpha$ f-SUC2(C)               | $\alpha$ -factor display by Suc2(C) anchor                                         |
| IMG-4/pUESC $\alpha$ f-FS(N)                 | $\alpha$ -factor display by FS(N) anchor                                           |
| IMG-4/pUESC $\alpha$ f-FS(C)                 | $\alpha$ -factor display by FS(C) anchor                                           |
| <b>Figure S3</b>                             |                                                                                    |
| IMG-50/pGK-SSTR5-HA/pGK42                    | SSTR5 expression / Mock control                                                    |
| IMG-50/pGK-SSTR5-HA/pGK-S1442                | SSTR5 expression / S-14 display by Flo42 anchor (s.s. of prepro- $\alpha$ -factor) |
| IMG-50/pGK-SSTR5-HA/pGK-S2842                | SSTR5 expression / S-28 display by Flo42 anchor (s.s. of prepro- $\alpha$ -factor) |
| IMG-50/pGK-SSTR5-HA/pGK-AS1442               | SSTR5 expression / S-14 display by Flo42 anchor (s.s. of pre- $\alpha$ -factor)    |
| IMG-50/pGK-SSTR5-HA/pGK-SS1442               | SSTR5 expression / S-14 display by Flo42 anchor (s.s. of Suc2)                     |
| IMG-50/pGK-SSTR5-HA/pGK-GS1442               | SSTR5 expression / S-14 display by Flo42 anchor (s.s. of GLA)                      |
| <b>Figure S4</b>                             |                                                                                    |
| IMG-50/pGK-SSTR5-HA/pGK42                    | SSTR5 expression / Mock control                                                    |
| IMG-50/pGK-SSTR5-HA/pGK-S1442                | SSTR5 expression / S-14 display by Flo42 anchor                                    |
| IMG-50/pGK-SSTR5-HA/pGK-S1442                | SSTR5 expression / S-14 display by Flo42 anchor (inserting GS5 linker)             |
| IMG-50/pGK-SSTR5-HA/pGS5-S1442               | SSTR5 expression / S-14 display by Flo42 anchor (inserting GS9 linker)             |
| <b>Figure S5</b>                             |                                                                                    |
| IMG-50/pGK-SSTR5-HA/pGK42                    | SSTR5 expression / Mock control                                                    |
| IMG-50/pGK-SSTR5-HA/pGK-AS1442               | SSTR5 expression / S-14 display by Flo42 anchor (s.s. of pre- $\alpha$ -factor)    |
